# Supplementary material for: Characterization of photosynthetic gas exchange in leaves under simulated adaxial and abaxial surfaces alternant irradiation
Source: PubMed Central journal article supplement (PMC4932497; doi:10.1038/srep26963), 2016-07-05

**Title: Characterization of photosynthetic gas exchange in leaves under simulated adaxial and abaxial surfaces alternant irradiation**

Zi-Shan Zhang<sup>1,2,3,†</sup>, Yu-Ting Li<sup>1,3,†</sup>, Hui-Yuan GAO<sup>1,3\*</sup>, Cheng Yang<sup>4</sup>, Qing-Wei Meng<sup>1,2</sup>

<sup>1</sup>State Key Lab of Crop Biology, Tai'an, Shandong Province, China;

<sup>2</sup>College of Horticulture Science and Engineering, Shandong Agricultural University, Tai'an, Shandong Province, China;

<sup>3</sup>College of Life Sciences, Shandong Agricultural University, Tai'an, Shandong Province, China;

<sup>4</sup>Wheat Research Institute, Henan Academy of Agricultural Sciences, Zhengzhou, Henan 450002, China;

<sup>†</sup>These authors contributed equally to this work.

\*Corresponding author: Gao Hui-Yuan; Telephone number: 86 538 8245985; E-mail address: gaohy@sdau.edu.cn

Supplementary Figure S1: The steady-state Pn, E, WUE and absorptance of the leaves that received irradiation from the adaxial or abaxial surface. The steady-state net photosynthetic rates ( $Pn_s$ ; a-c), transpiration rate ( $E_s$ ; d-f), water use efficiency ( $WUE_s$ , g-i) and absorptance to photosynthetic active radiation (400-700nm; abs; j-l) in leaves of *Platanus orientalis* L. (a, d, g, j), *Melia azedarach* L. (b, e, h, k) and *Solanum lycopersicum* L. (c, f, i, l) when either adaxial (ad) or abaxial (ab) surfaces of leaves were irradiated by  $1,000 \mu\text{mol m}^{-2} \text{s}^{-1}$  light. Different letters indicate significant differences between adaxial and abaxial surfaces irradiation. Values are means ( $\pm$  SE),  $n = 5$  (for  $Pn_s$ ,  $E_s$  and  $WUE_s$ ) or 15 (for abs).

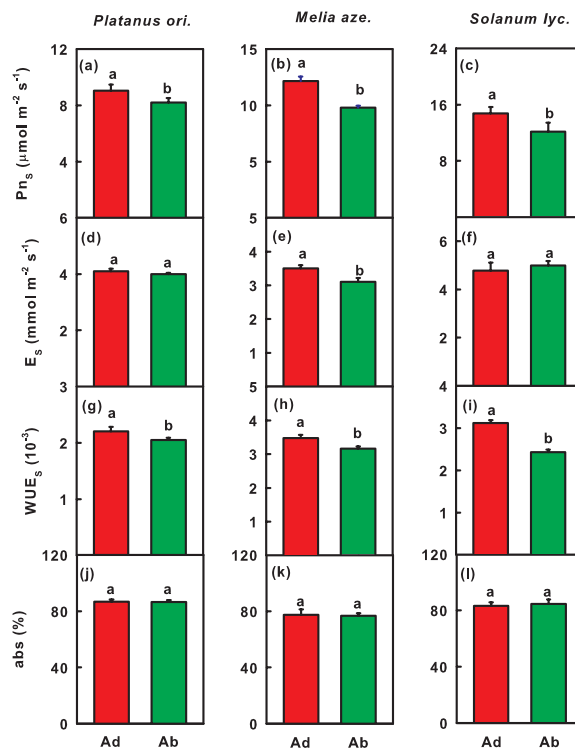

Supplementary Figure S2: Time course of the transpiration rate and water use efficiency of leaves under simulated ad-ab-alt irradiation. Time course for the transpiration rate (E) and water use efficiency (WUE) in leaves of *Platanus orientalis* L., *Melia azedarach* L. and *Solanum lycopersicum* L. when the adaxial or abaxial surfaces of leaves were irradiated by fluctuating light, in which the irradiation was switched between high light ( $1,000 \mu\text{mol m}^{-2} \text{s}^{-1}$ ) and low light ( $100 \mu\text{mol m}^{-2} \text{s}^{-1}$ ) every 4 min or 2 min or 1 min.

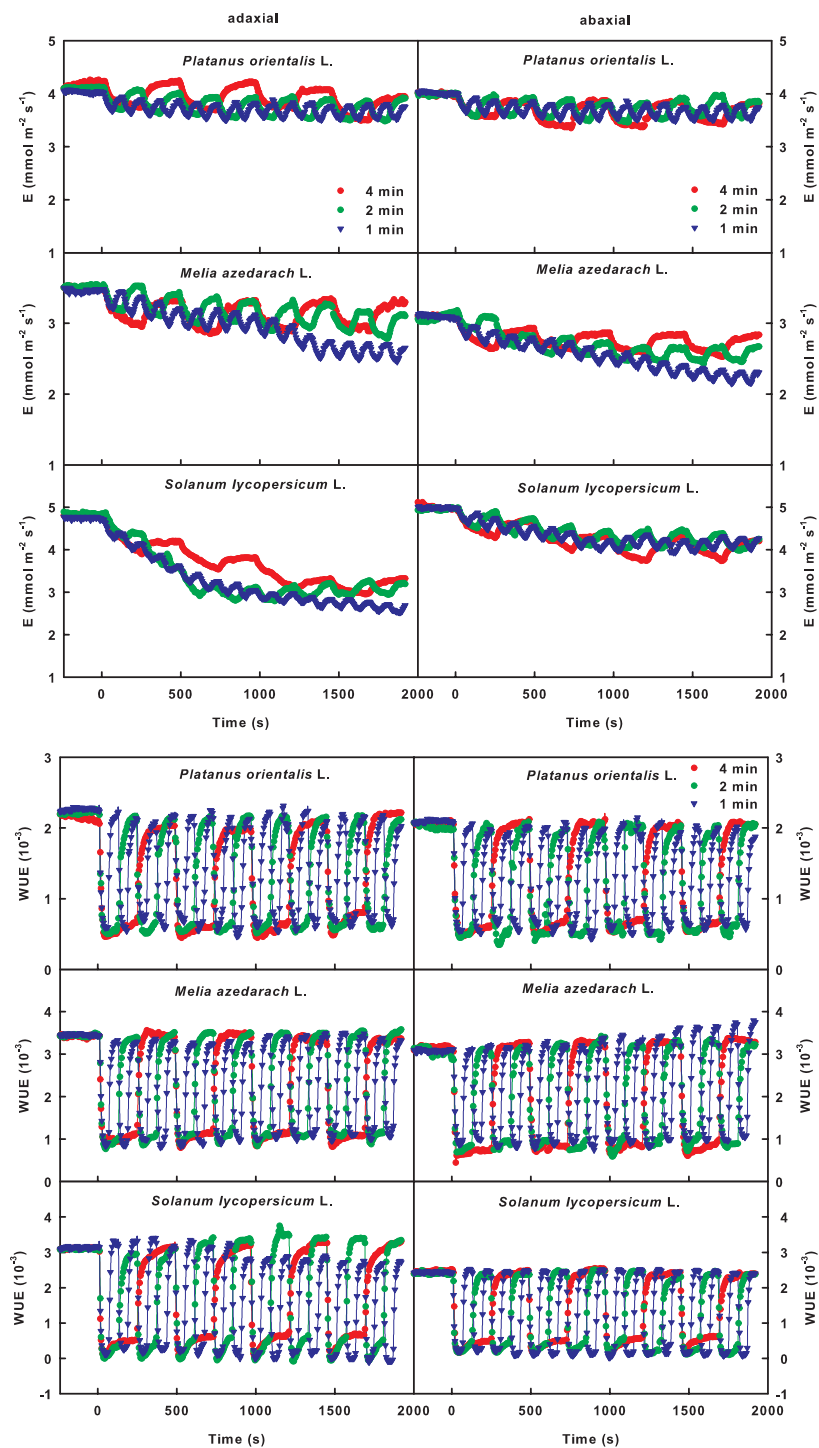

Supplementary Figure S3: The maximum Pn, E and WUE during the high light period and the minimum E during the low light period under simulated ad-ab-alt irradiation. The maximum of net photosynthetic rate ( $Pn_{max}$ ), transpiration rate ( $E_{max}$ ) and water use efficiency ( $WUE_{max}$ ) during the high light period of fluctuating irradiation, and the minimum of E ( $E_{min}$ ) during the low light period of fluctuating irradiation. During measurement, the adaxial and abaxial surfaces of leaves from *Platanus orientalis* L., *Melia azedarach* L. and *Solanum lycopersicum* L. were irradiated by fluctuating light, in which the irradiation was switched between low light ( $100 \mu\text{mol m}^{-2} \text{s}^{-1}$ ) and high light ( $1,000 \mu\text{mol m}^{-2} \text{s}^{-1}$ ) every 4 min or 2 min or 1 min. Values are means ( $\pm$  SE),  $n = 5$ .

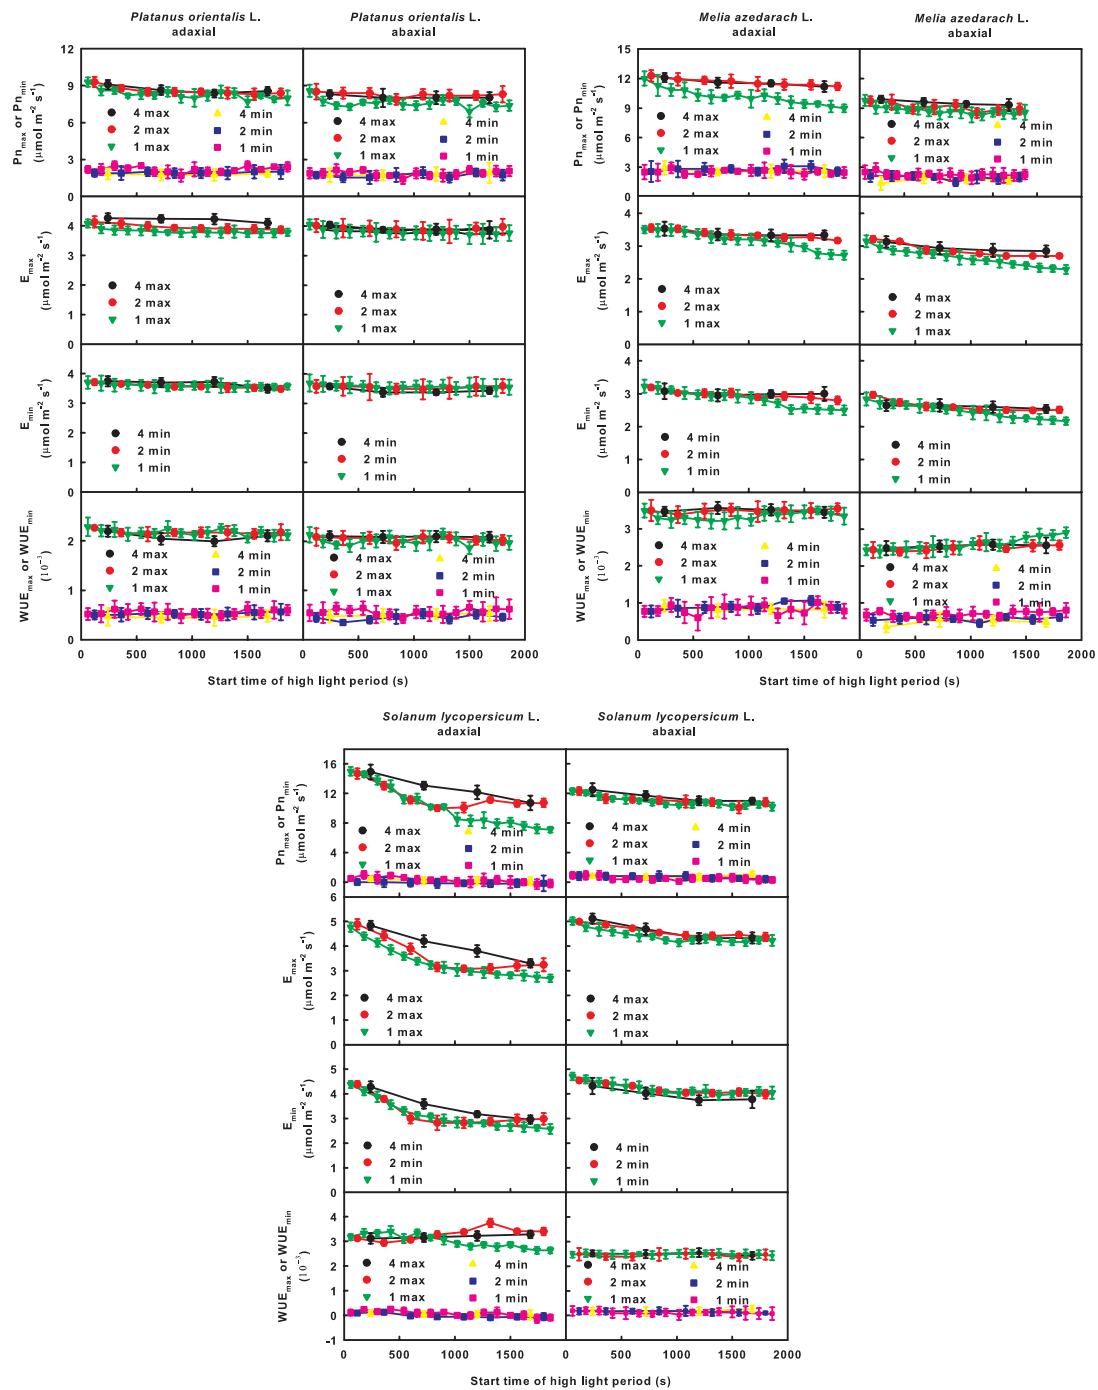

Supplementary Figure S4: The time required to reach 90% of the maximum transpiration rate ( $T_{90}$  of E) and water use efficiency ( $T_{90}$  of WUE) after the irradiation was shifted from low light to high light. During measurement, the adaxial and abaxial surfaces of leaves from *Platanus orientalis* L., *Melia azedarach* L. and *Solanum lycopersicum* L. were irradiated by fluctuating light, in which the irradiation was switched between high ( $100 \mu\text{mol m}^{-2} \text{s}^{-1}$ ) and low light ( $100 \mu\text{mol m}^{-2} \text{s}^{-1}$ ) every 4 min or 2 min or 1 min. Values are means ( $\pm$  SE),  $n = 5$ .

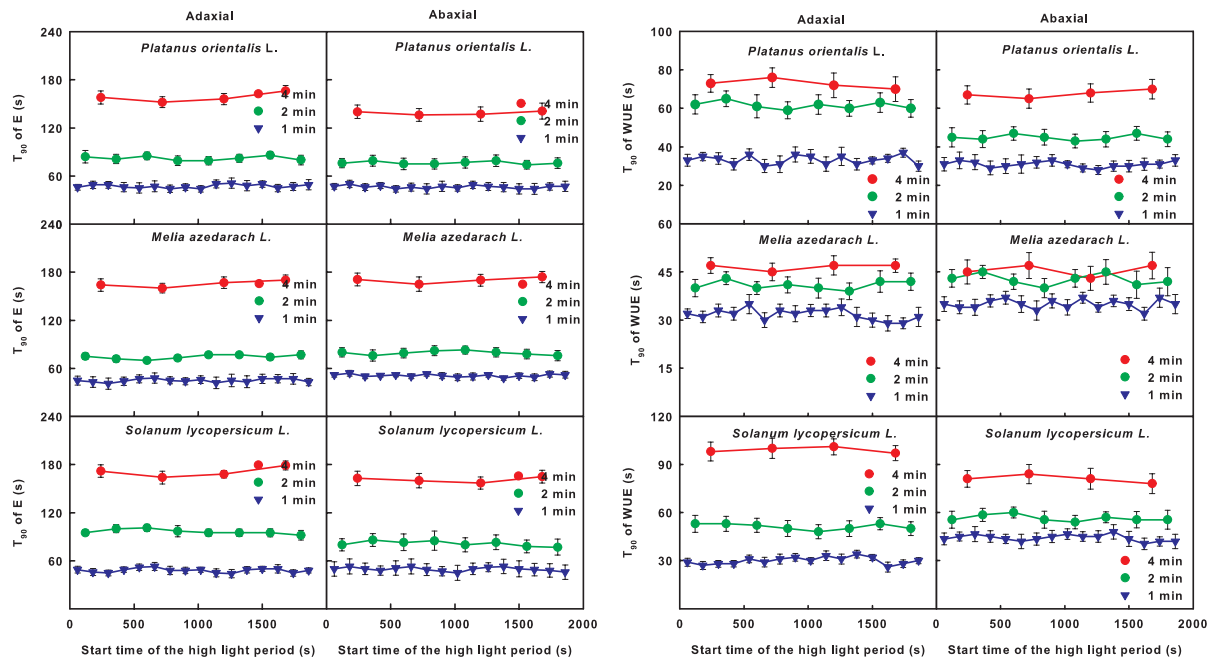

Supplement: srep26963-s1.pdf [file srep26963-s1.pdf]
